# Supplementary material for: Inverted CH3NH3PbI3 perovskite hybrid solar cells with improved flexibility by introducing a polymeric electron conductor
Source: Royal Society of Chemistry journal article supplement (doi:10.1039/c6tc05081f), 2017-01-01
Supplement: c6tc05081f1.pdf [file c6tc05081f1.pdf]

Supplementary Information

**Inverted flexible  $\text{CH}_3\text{NH}_3\text{PbI}_3$  perovskite hybrid solar cells with improved flexibility by introduction of polymeric electron conductor**

Jin Hyuck Heo<sup>1</sup>, Muhammad Jahandar<sup>2,3</sup>, Sang-Jin Moon<sup>2,3</sup>, Chang Eun Song<sup>2,3,\*</sup>, Sang Hyuk Im<sup>1,\*</sup>

<sup>1</sup> Department of Chemical and Biological Engineering, Korea University, 145 Anam-ro, Seongbuk-gu, Seoul 136-713, Republic of Korea. E-mail: imromy75@gmail.com

<sup>2</sup> Energy Materials Research Center, Korea Research Institute of Chemical Technology (KRICT), 141 Gajeong-ro, Yuseong-gu, Daejeon 34114, Republic of Korea. E-mail: songce@kRICT.re.kr

<sup>3</sup> Department of Nanomaterials Science and Engineering, University of Science and Technology (UST), 217 Gajeong-ro, Yuseong-gu, Daejeon 34113, Republic of Korea

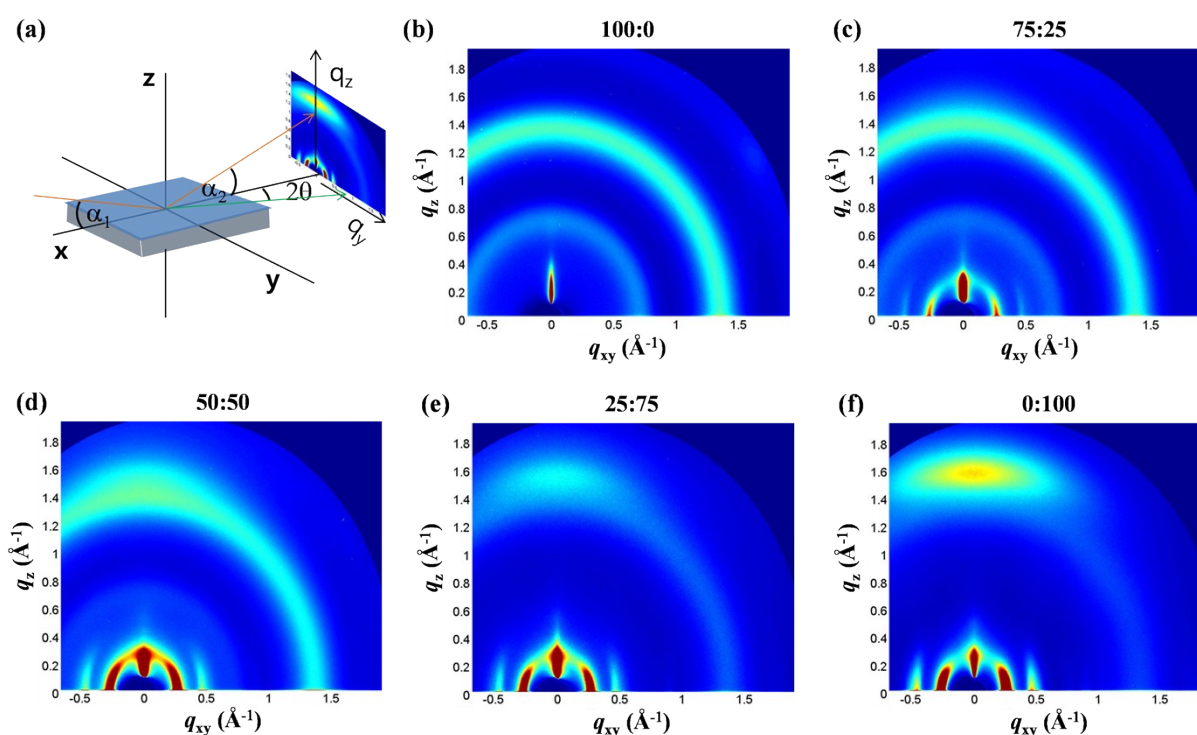

**Fig. S1.** GIWAX scattering images of PCBM:PNDI-2T films with different compositional ratio. (a) schematic illustration for explaining GIWAX scattering image, (b) 100:0, (c) 75:25, (d) 50:50, (e) 25:75, and (f) 0:100.

| Electron Transport Layer<br>(PC <sub>61</sub> BM:PNDI-2T) | $\mu_e$<br>[cm <sup>2</sup> /V s] <sup>a</sup> |
|-----------------------------------------------------------|------------------------------------------------|
| 100:0                                                     | $2.60 \times 10^{-4}$                          |
| 75:25                                                     | $2.08 \times 10^{-4}$                          |
| 50:50                                                     | $1.29 \times 10^{-4}$                          |
| 25:75                                                     | $2.63 \times 10^{-5}$                          |
| 0:100                                                     | $2.07 \times 10^{-5}$                          |

<sup>a</sup>Electron-only device is ITO/ZnO/Active Layer/LiF/Al.

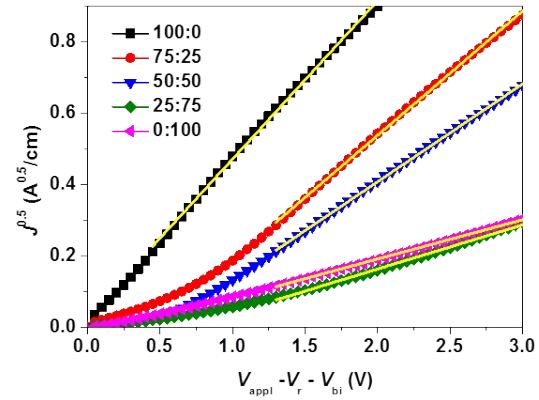

**Fig. S2.** The space charge limited current (SCLC) electron mobility for PCBM:PNDI-2T electron conductor films with content ratios of 100:0, 75:25, 50:50, 25:75 and 0:100.

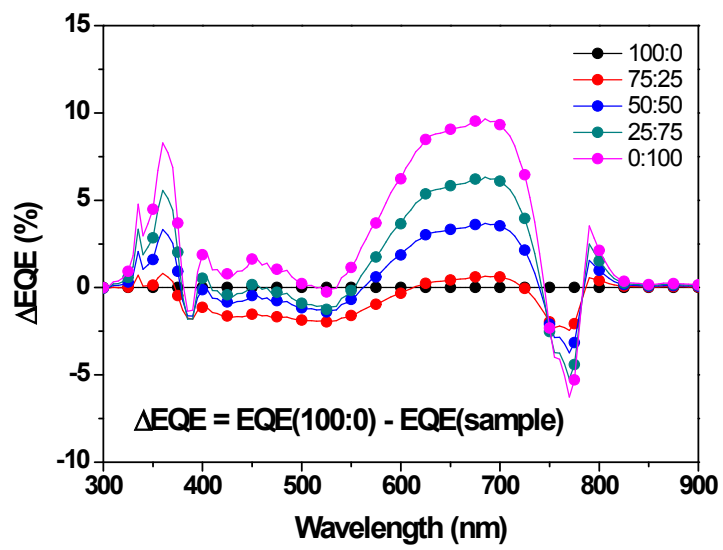

**Fig. S3.**  $\Delta EQE$  (=  $EQE(100:0) - EQE(\text{sample})$ ) spectra of inverted type MAPbI<sub>3</sub> perovskite solar cells.

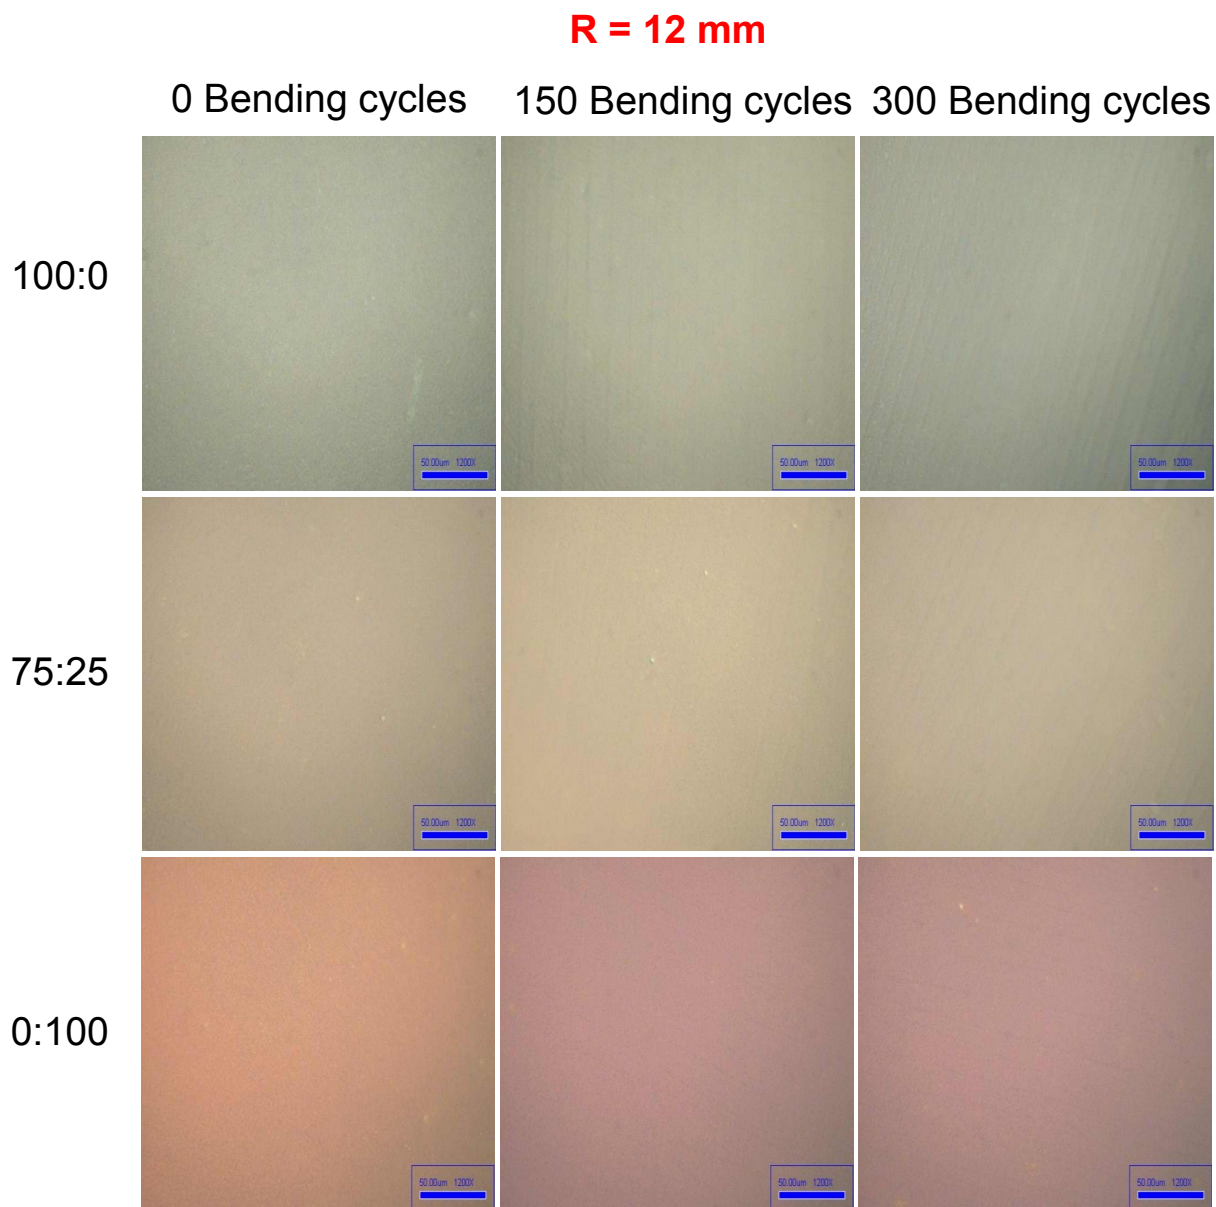

**Fig. S4.** The optical microscopy images of PCBM:PNDI-2T = 100:0, 75:25, and 0:100 electron conductor films with respect to bending curvature radius ( $R = 12$  mm) and number of bending cycles (0, 150 and 300 cycles).

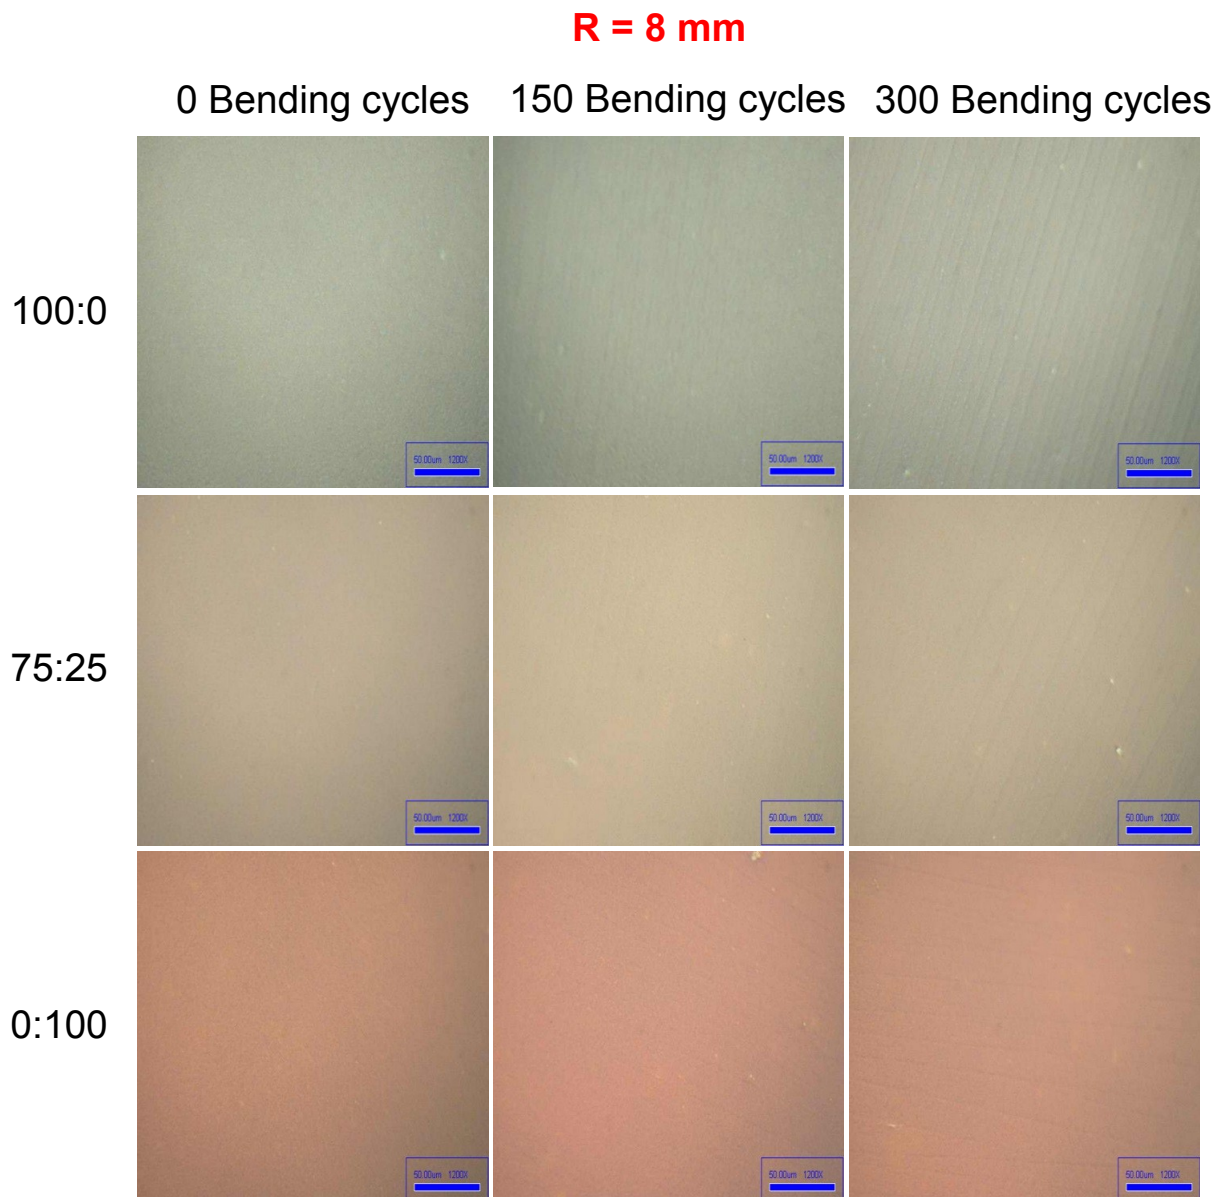

**Fig. S5.** The optical microscopy images of PCBM:PNDI-2T = 100:0, 75:25, and 0:100 electron conductor films with respect to bending curvature radius ( $R = 8 \text{ mm}$ ) and number of bending cycles (0, 150 and 300 cycles).

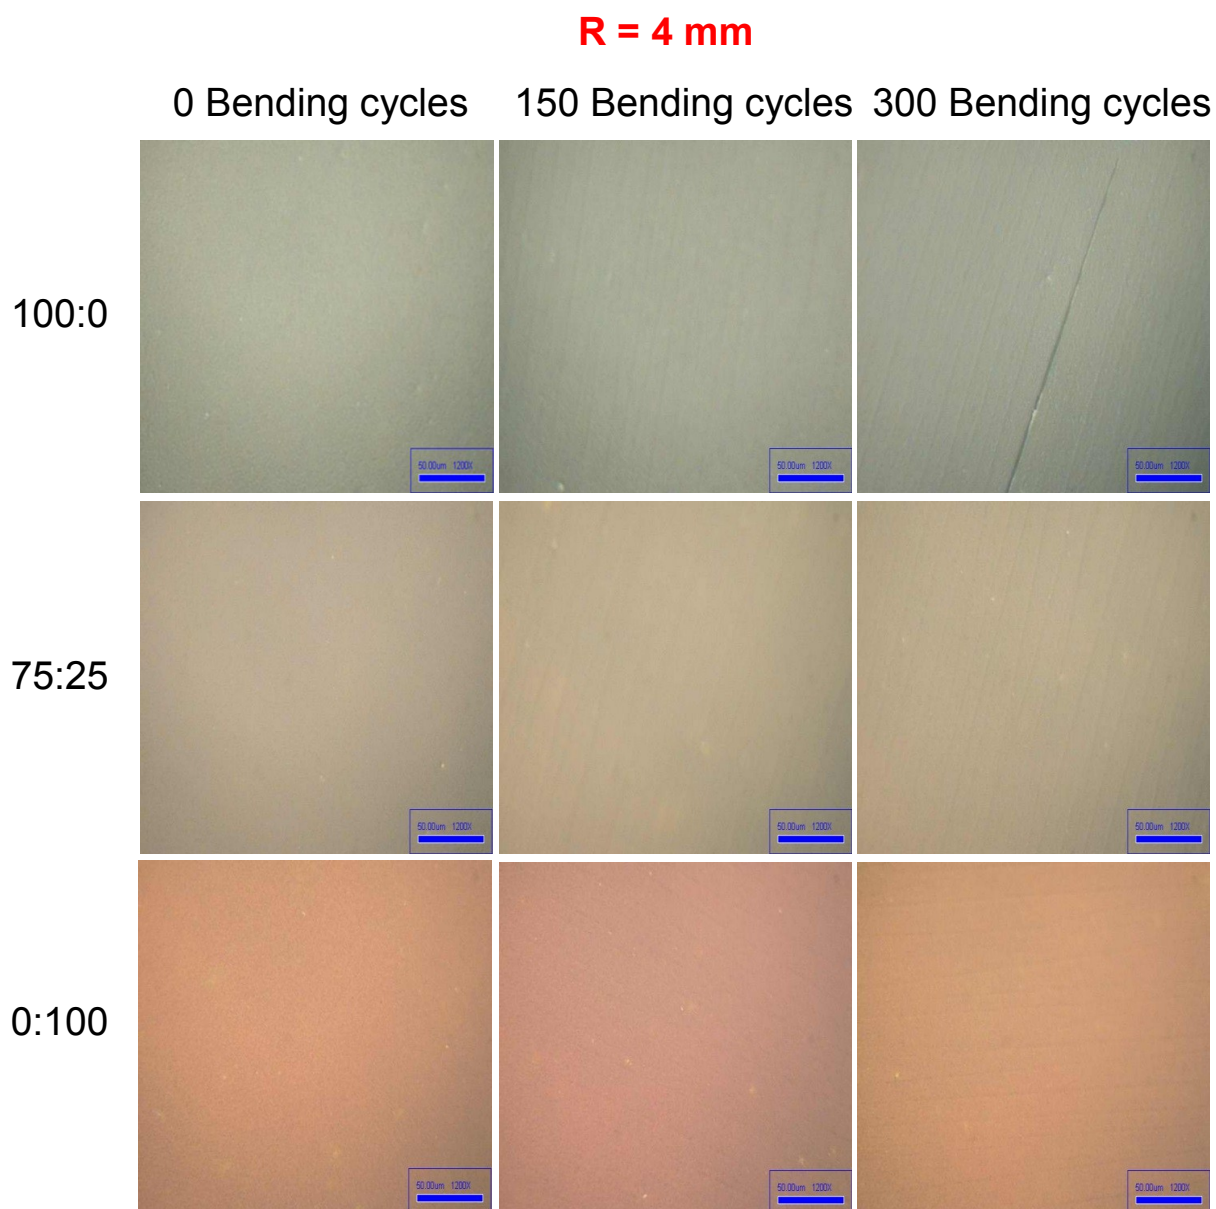

**Fig. S6.** The optical microscopy images of PCBM:PNDI-2T = 100:0, 75:25, and 0:100 electron conductor films with respect to bending curvature radius ( $R = 4$  mm) and number of bending cycles (0, 150 and 300 cycles).
